# Supplementary material for: Nitrogen/oxygen co-doped monolithic carbon electrodes derived from melamine foam for high-performance supercapacitors
Source: Royal Society of Chemistry journal article supplement (doi:10.1039/c8ta06471g), 2018-01-01
Supplement: c8ta06471g1.pdf [file c8ta06471g1.pdf]

## Supporting Information

### **Nitrogen/Oxygen Co-doped Carbon Monolithic Electrode Derived from Melamine Foam for High-Performance Supercapacitors**

Rui Zhang,<sup>a</sup> Xiangxia Jing,<sup>a</sup> Yanting Chu,<sup>b</sup> Lei Wang,<sup>a</sup> Wenjun Kang,<sup>a</sup> Denghu Wei,<sup>c</sup>  
Haibo Li,<sup>\*a,d</sup> and Shenglin Xiong<sup>\*b</sup>

<sup>a</sup>School of Chemistry and Chemical Engineering, Liaocheng University, Liaocheng 252059, PR China

<sup>b</sup>Key Laboratory of the Colloid and Interface Chemistry Ministry of Education and School of Chemistry and Chemical Engineering, Shandong University, Jinan 250100, PR China

<sup>c</sup>School of Materials Science and Engineering, Liaocheng University, Liaocheng 252059, PR China

<sup>d</sup>Department of Chemical and Biomolecular Engineering, National University of Singapore, 10 Kent Ridge Crescent, Singapore 119260, Singapore

\*Correspondence and requests for materials should be addressed to H.B.L. (email: haiboli@mail.ustc.edu.cn) or to S.L.X. (email: chexsl@sdu.edu.cn).

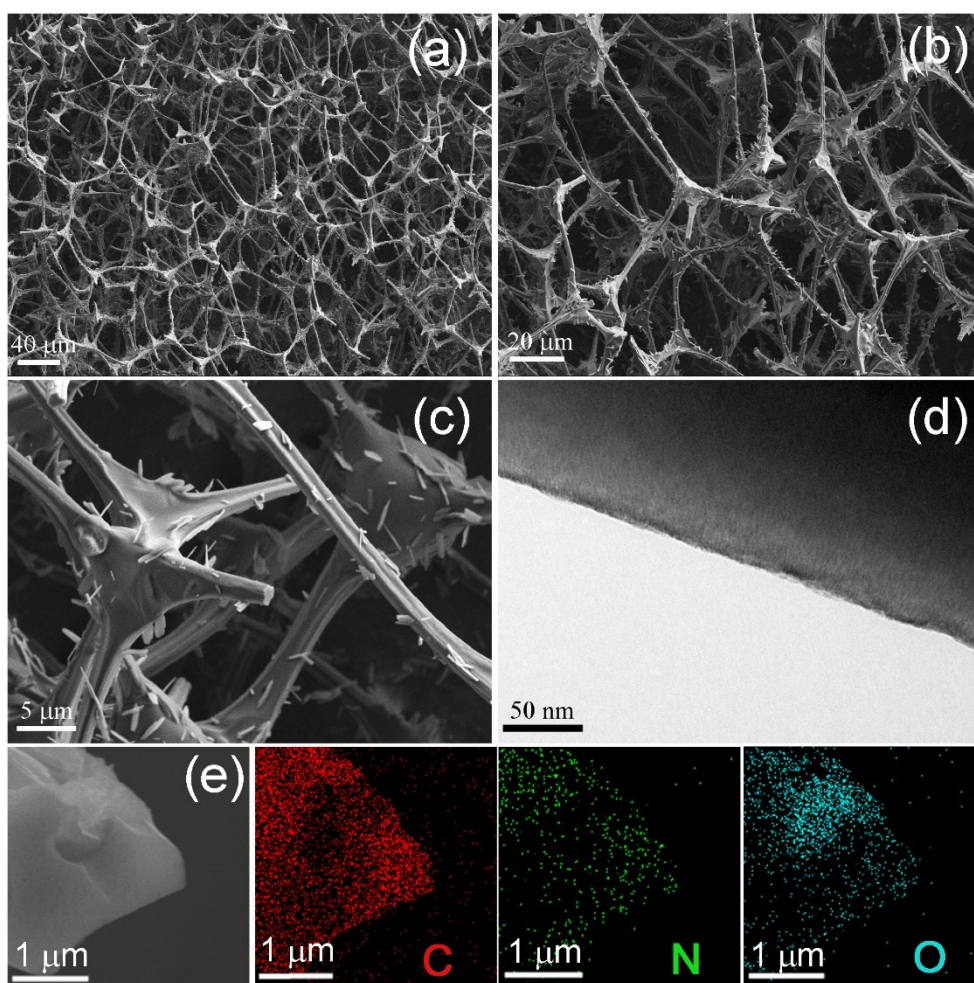

**Fig. S1** (a, b, c) SEM images, (d) TEM image, and (e) element mapping of NOCS-0.

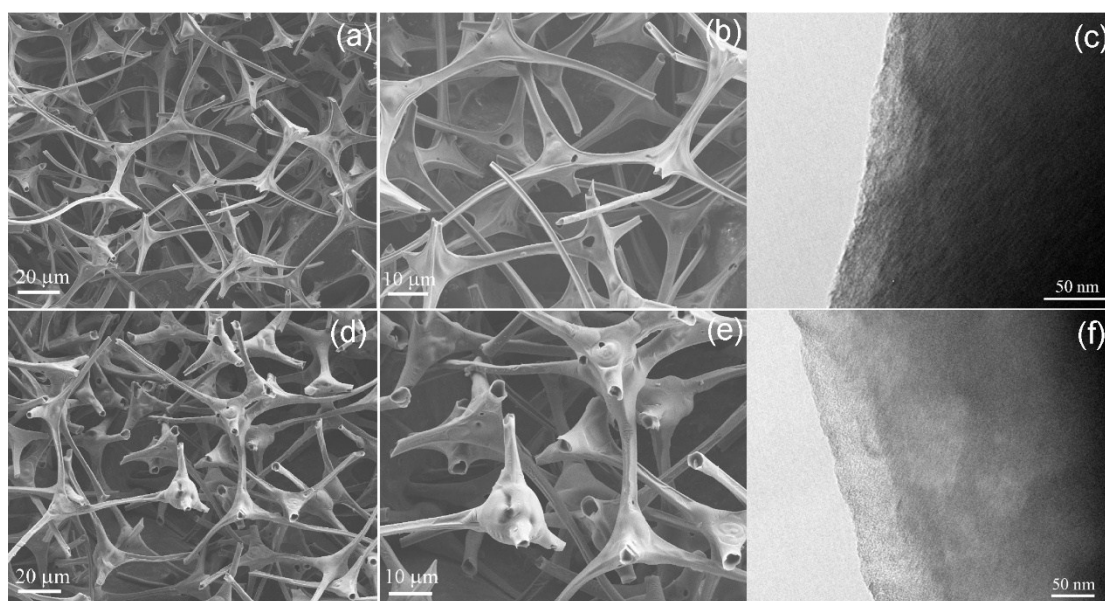

**Fig. S2** SEM and TEM images for (a, b, c) NOCS-1/20 and (d, e, f) NOCS-1/5.

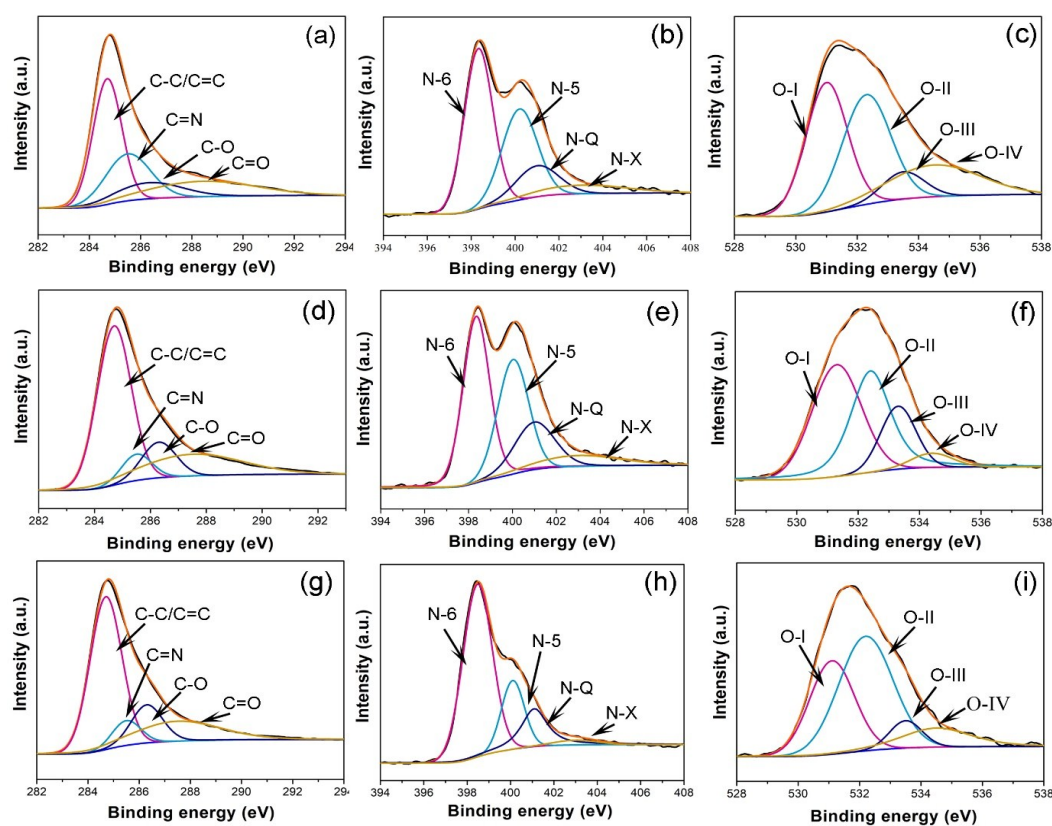

**Fig. S3** Peak-fitting XPS spectra of (a, d, g) C1s, (b, e, h) N1s, and (c, f, i) O1s for (a, b, c) NOCS-0, (d, e, f) NOCS-1/20, and (g, h, i) NOCS-1/5.

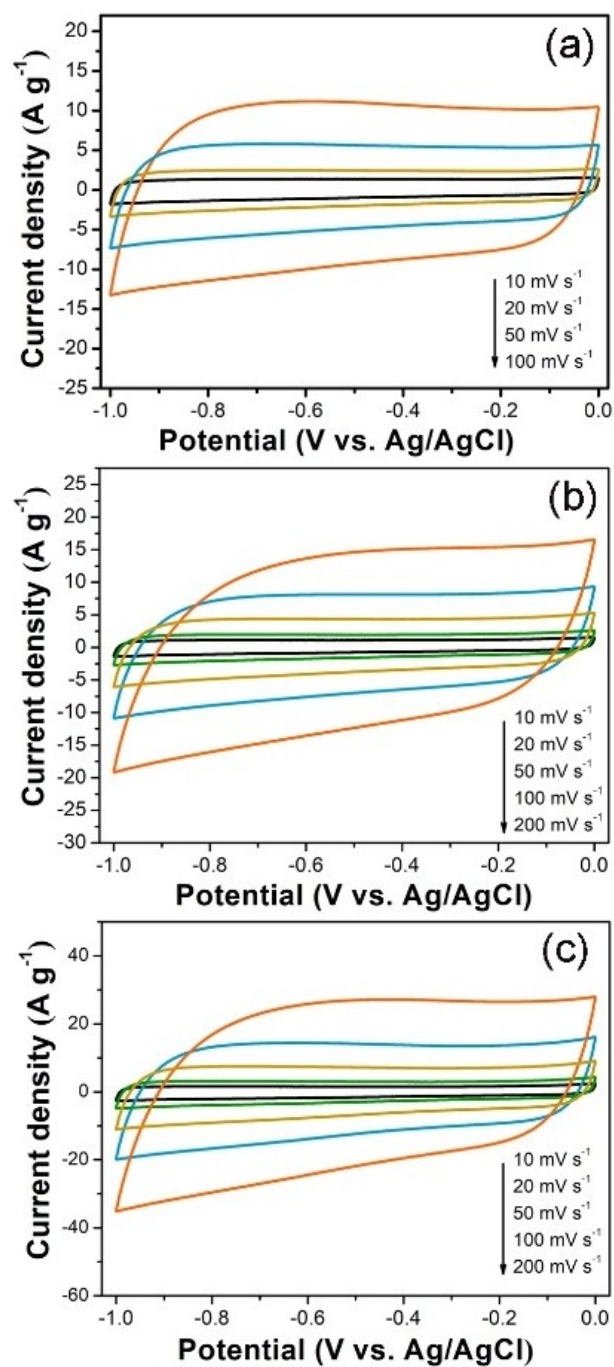

**Fig. S4** CV curves for (a) NOCS-0, (b) NOCS-1/20, and NOCS-1/5 at different scan rates in 6.0 M KOH.

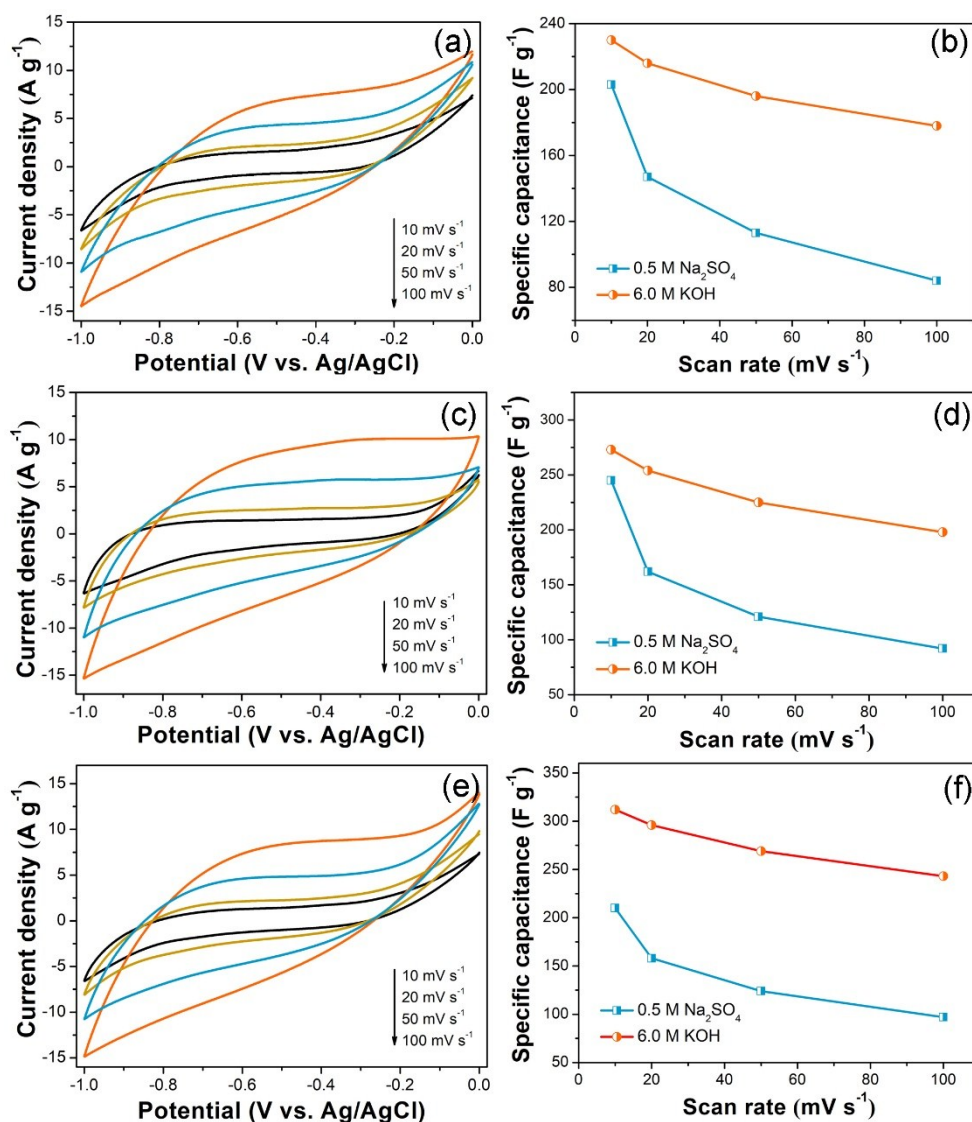

**Fig. S5** CV curves for (a) NOCS-0, (c) NOCS-1/20, and (e) NOCS-1/5 at different scan rates in 0.5 M  $\text{Na}_2\text{SO}_4$ . Comparison of specific capacitances for (b) NOCS-0, (d) NOCS-1/20, and (f) NOCS-1/5 in 6.0 M KOH and 0.5 M  $\text{Na}_2\text{SO}_4$ .

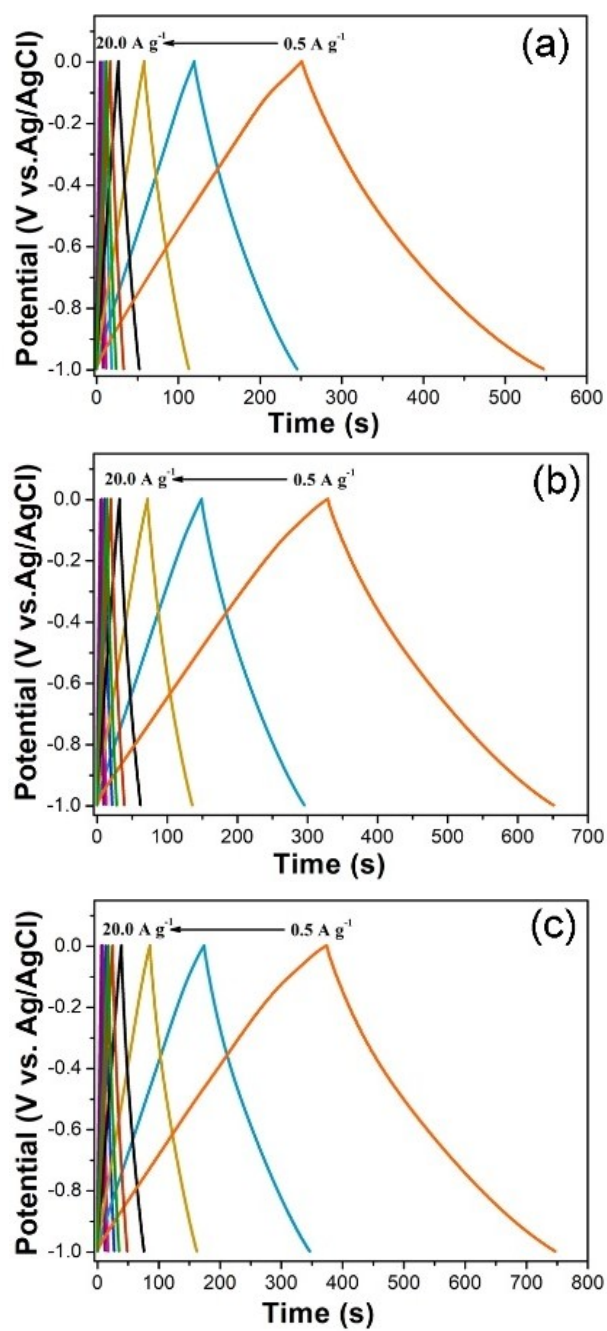

**Fig. S6** GCD curves for (a) NOCS-0, (b) NOCS-1/20, and NOCS-1/5 at different current densities (0.5, 1.0, 2.0, 4.0, 6.0, 8.0, 10, 15, and 20 A g<sup>-1</sup>) in 6.0 M KOH solution.

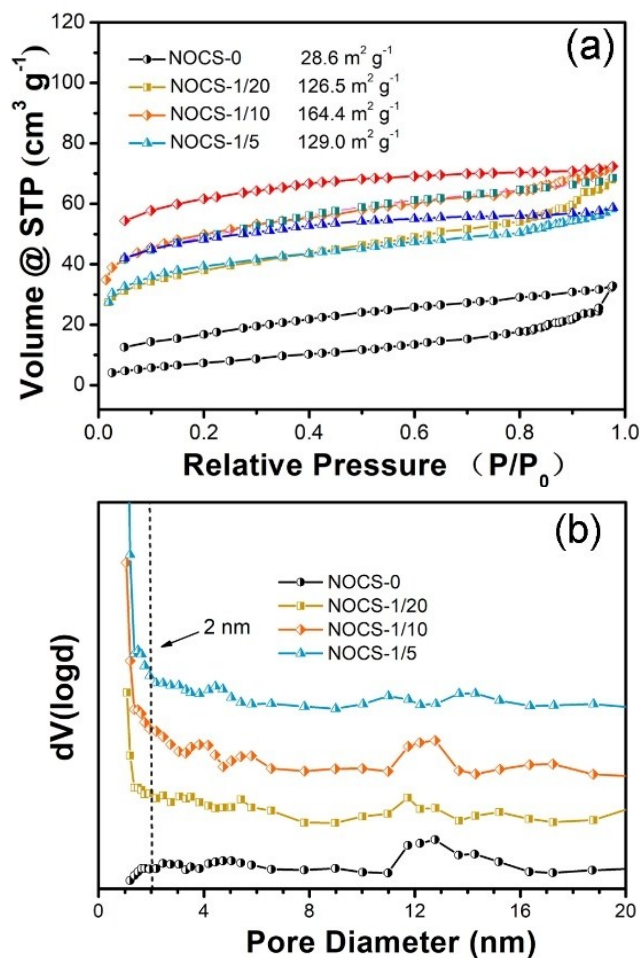

**Fig. S7** (a) N<sub>2</sub> adsorption/desorption isotherms and (b) BJH pore size distributions for NOCS-0, NOCS-1/20, NOCS-1/10, and NOCS-1/5.

**Table S1.** Pore structure parameters from N<sub>2</sub> adsorption/desorption isotherms.

| Samples   | <sup>a</sup> S <sub>total</sub><br>m <sup>2</sup> g <sup>-1</sup> | <sup>b</sup> S <sub>macro+meso</sub> m <sup>2</sup><br>g <sup>-1</sup> | S <sub>micro</sub><br>m <sup>2</sup> g <sup>-1</sup> | <sup>c</sup> V <sub>total</sub><br>cm <sup>3</sup> g <sup>-1</sup> | <sup>d</sup> V <sub>micro</sub><br>cm <sup>3</sup> g <sup>-1</sup> |
|-----------|-------------------------------------------------------------------|------------------------------------------------------------------------|------------------------------------------------------|--------------------------------------------------------------------|--------------------------------------------------------------------|
| NOCS-0    | 28.6                                                              | 28.6                                                                   | 0                                                    | 0.054                                                              | 0                                                                  |
| NOCS-1/20 | 126.5                                                             | 54.6                                                                   | 71.9                                                 | 0.105                                                              | 0.036                                                              |
| NOCS-1/10 | 164.4                                                             | 50.7                                                                   | 113.7                                                | 0.113                                                              | 0.057                                                              |
| NOCS-1/5  | 129.0                                                             | 39.8                                                                   | 89.2                                                 | 0.090                                                              | 0.044                                                              |

<sup>a</sup>The total surface area (S<sub>total</sub>) and the surface area of micro-pores (S<sub>micro</sub>) were obtained from multipoint Brunauer–Emmett–Teller (BET) plots and V–t plots, respectively. <sup>b</sup>The surface area of the meso-/macro-pores (S<sub>meso+macro</sub>) was acquired by subtracting S<sub>micro</sub> from S<sub>total</sub>. <sup>c</sup>The total porevolume (V<sub>total</sub>) was determined at P/P<sub>0</sub> = 0.98, and <sup>d</sup>the micro-pore volume (V<sub>micro</sub>) was calculated from the V–t plot.

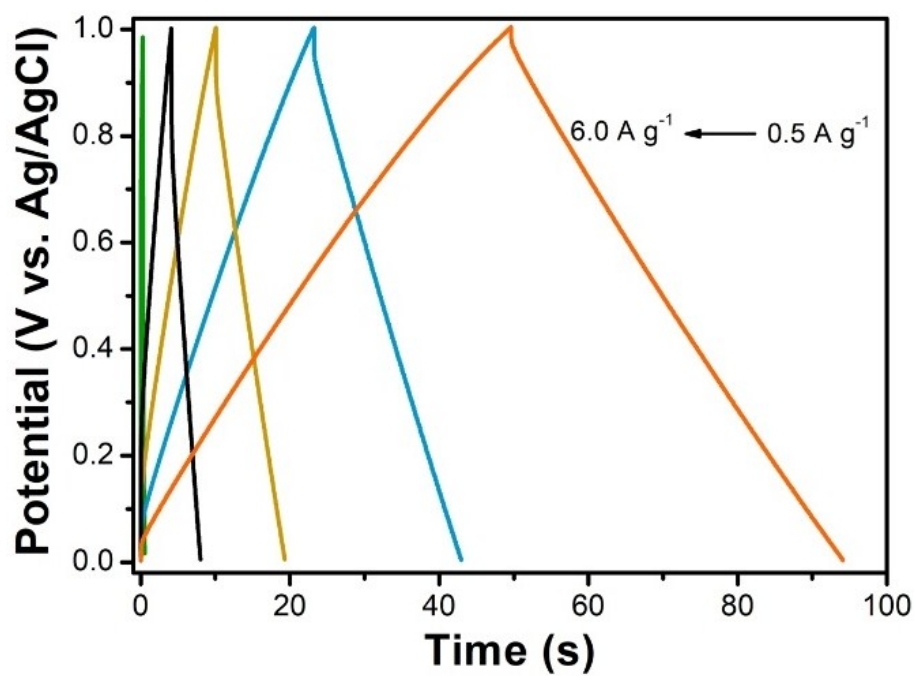

**Fig. S8** Galvanostatic charge-discharge curves of an all-solid-state supercapacitor assembled by NOCS-0 monolithic electrodes (current densities: 0.5, 1.0, 2.0, 4.0, and 6.0 A g<sup>-1</sup>).

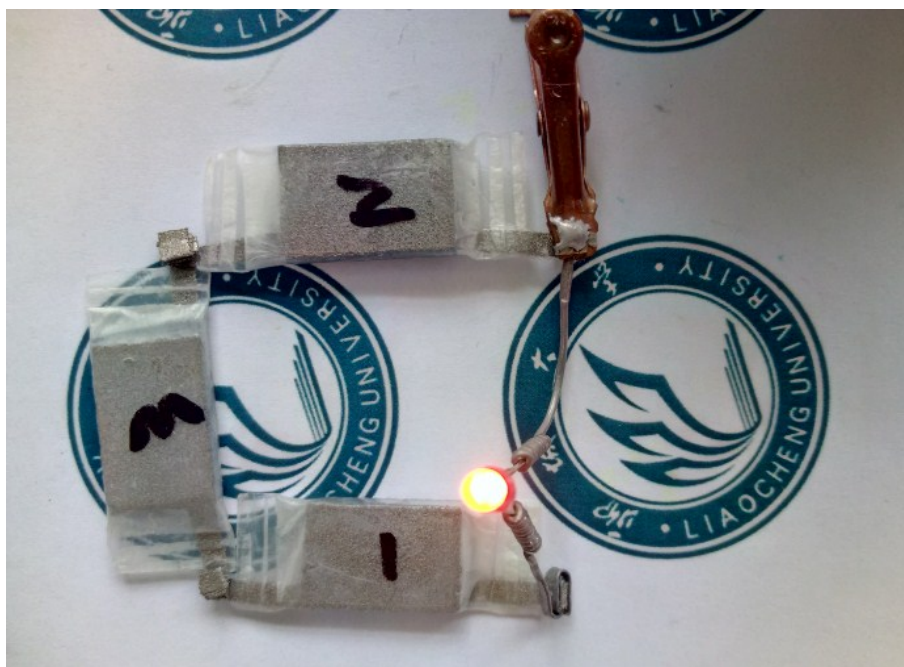

**Fig. S9** The photograph of a red LED light illuminated by three NOCS-1/10 supercapacitors in series.
